# Supplementary material
Source: PubMed Central journal article supplement (PMC6698136)
Supplement: NIHMS1042639-supplement-Supplement.pdf [file NIHMS1042639-supplement-Supplement.pdf]

1 **Supplementary Figures and Table**

2

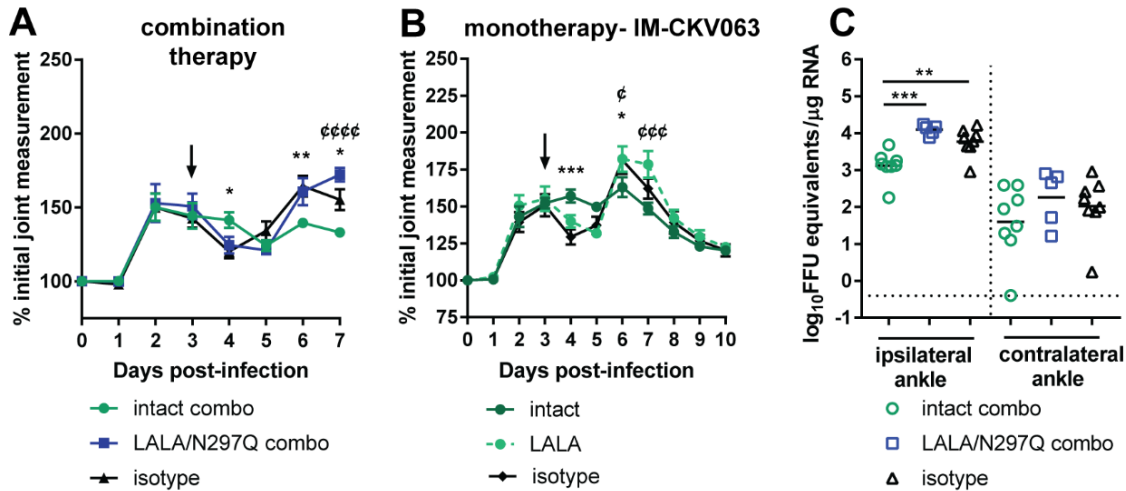

3

4 **Figure S1. IM-CKV063 in combination with CHK-166 reduces clinical disease and viral**

5 **RNA.** WT mice were inoculated with  $10^3$  FFU of CHIKV and then administered a (A, C) cocktail

6 of intact or LALA/N297Q variants of anti-CHIKV human mAbs [IM-CKV063 + CHK-166 (250

7  $\mu\text{g}/\text{mAb}$ ; 500  $\mu\text{g}$  total)] or an isotype control [WNV hE16 (500  $\mu\text{g}$ )] or (B) intact or LALA variant

8 of IM-CKV063 (250  $\mu\text{g}/\text{mAb}$ ) or an isotype control (250  $\mu\text{g}$ ) at 3 dpi. (A) Foot swelling was

9 measured prior to infection and for 7 dpi. Significance was determined by a two-way ANOVA

10 with Tukey's post-test (\* intact vs isotype;  $^{\text{€}}$ intact vs LALA/N297Q;  $n = 5-8/\text{group}$ , two

11 experiments,  $*P < 0.05$ ,  $**P < 0.01$ ,  $^{\text{€€€€}}P < 0.0001$ ). (B) Foot swelling was measured prior to

12 infection and for 10 dpi ( $n = 7/\text{group}$ , two experiments, two-way ANOVA with Tukey's post-test;

13 \* intact vs isotype;  $^{\text{€}}$  intact vs LALA;  $*P < 0.05$ ,  $***P < 0.001$ ,  $^{\text{€}}P < 0.05$ ,  $^{\text{€€€}}P < 0.001$ ). (C)

14 Ipsilateral and contralateral ankles were harvested 7 dpi, and viral RNA levels were determined

15 by qRT-PCR ( $n = 5-8/\text{group}$ , two experiments,  $**$ ,  $P < 0.01$ ;  $***$ ,  $P < 0.001$ ; one-way ANOVA

16 with Tukey's post-test).

17

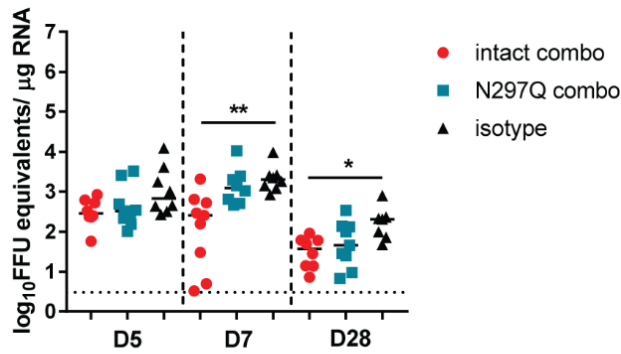

18

19

20 **Figure S2. Viral burden in contralateral ankle with anti-CHIKV mAb therapy.** WT mice

21 were inoculated with  $10^3$  FFU of CHIKV and administered a cocktail of intact or N297Q variants

22 of humanized anti-CHIKV mAbs or an isotype control mAb at 3 dpi. Contralateral ankles were

23 harvested at indicated days, and viral RNA was measured by qRT-PCR (5 and 7 dpi, n = 8-9/group,

24 28 dpi, n = 7-9/group, two experiments). Significance was determined by a Kruskal Wallis

25 ANOVA with Dunn's post-test (\*,  $P < 0.05$ ; \*\*,  $P < 0.01$ ).

26

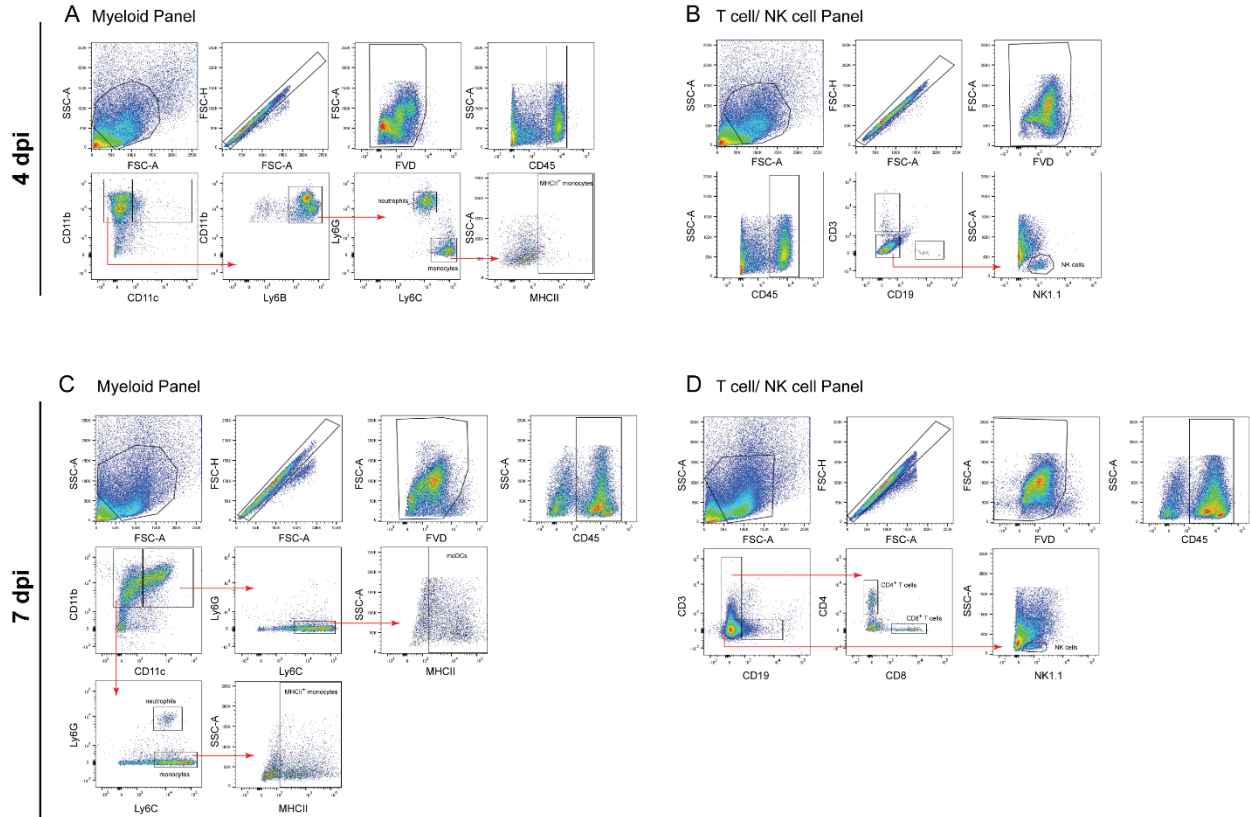

27

28

29

30

31

32

33

34

35

36

37

**Figure S3. Gating scheme for infiltrating immune cells in WT mice.** WT mice were inoculated with  $10^3$  FFU of CHIKV and administered a cocktail of intact or N297Q variants of humanized anti-CHIKV mAbs or an isotype control mAb at 3 dpi. Ipsilateral feet were harvested at (A-B) 4 dpi or (C-D) 7 dpi, and single cell suspensions were analyzed by flow cytometry. (A, C) Gating scheme for myeloid cells (monocytes, neutrophils, monocyte derived dendritic cells (moDCs), and MHCII<sup>+</sup> monocytes). (B, D) Gating scheme for lymphocytes (NK cells, CD4<sup>+</sup> T cells, CD8<sup>+</sup> T cells, and B cells). The plots are representative of two or three independent experiments. Fixable viability dye: FVD.

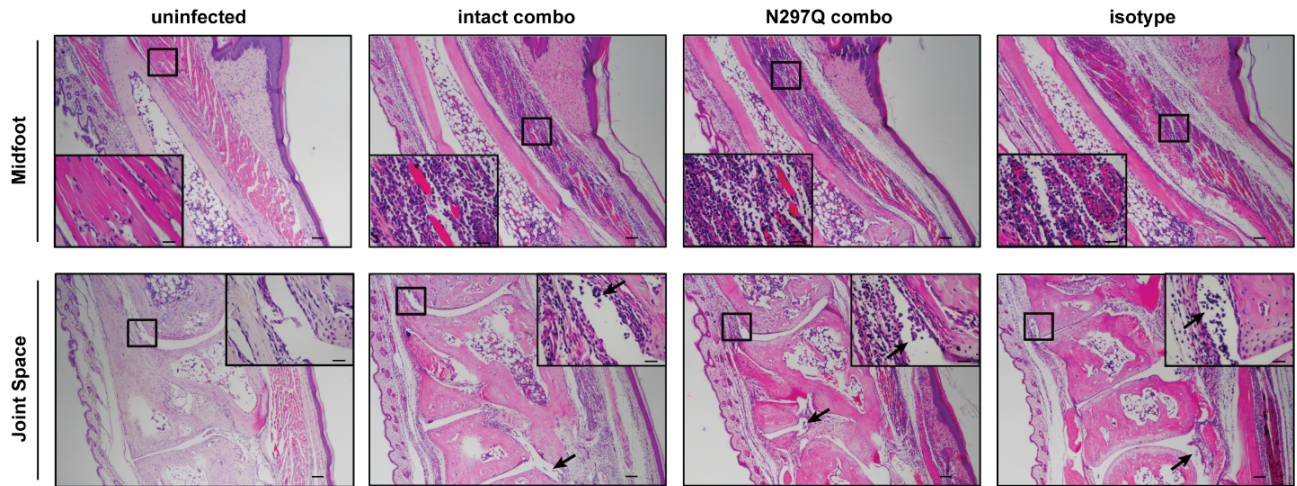

38  
 39 **Figure S4. Similar levels of cellular infiltration in the ipsilateral feet at 7 dpi.** WT mice were  
 40 inoculated with  $10^3$  FFU of CHIKV and then administered a cocktail of intact or N297Q variants  
 41 of humanized anti-CHIKV mAbs or an isotype control at 3 dpi. Ipsilateral feet were collected at 7  
 42 dpi, fixed, decalcified, paraffin-embedded, sectioned, and stained with H & E. Images show low-  
 43 magnification (scale bar 100  $\mu$ m) with a high magnification inset (scale bar 10  $\mu$ m). Top and  
 44 bottom panels are representative images of the midfoot and joint space, respectively (n = 6/group,  
 45 two experiments). Arrows indicate immune cell infiltration into the synovial space.

46

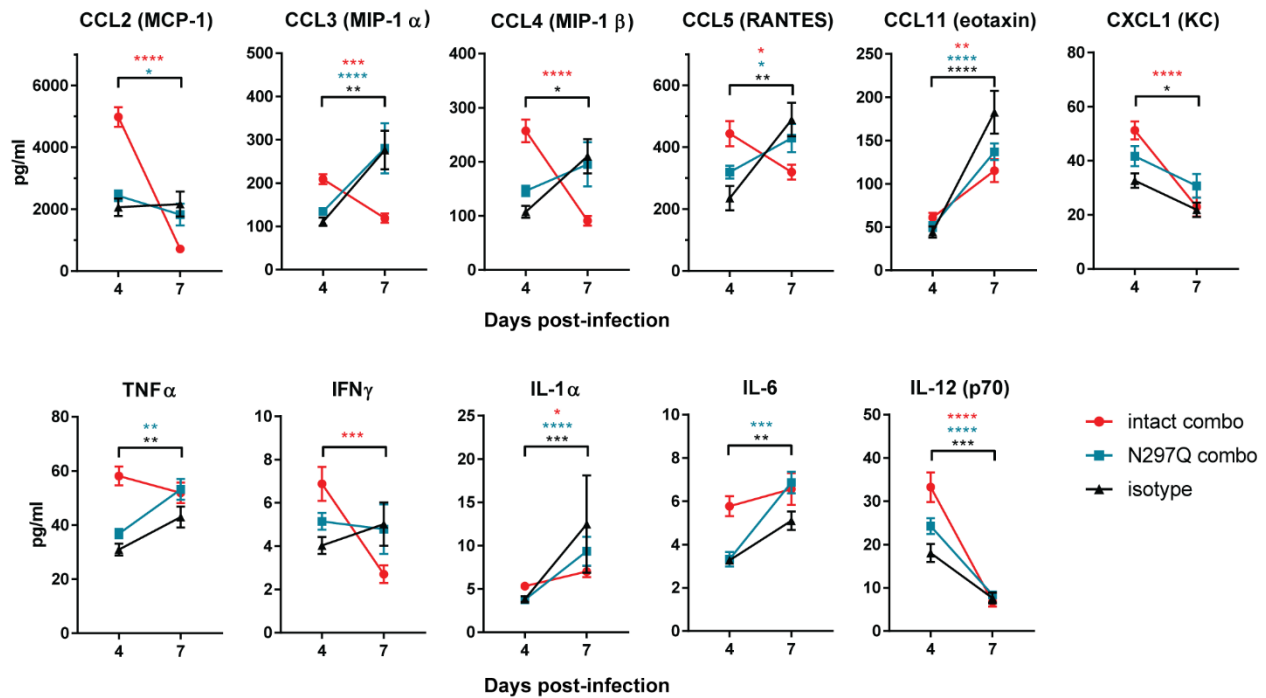

47  
 48 **Figure S5. Fc effector functions of antibody impact pro-inflammatory cytokine and**  
 49 **chemokine expression.** WT mice were inoculated with  $10^3$  FFU of CHIKV and administered a  
 50 cocktail of intact or N297Q variants of humanized anti-CHIKV mAbs or an isotype control at 3  
 51 dpi. Ipsilateral ankles were collected at 4 or 7 dpi and analyzed for chemokines (n = 8-10/group,  
 52 two experiments). Bars indicate mean values  $\pm$  SEM (\*,  $P < 0.05$ ; \*\*,  $P < 0.01$ ; \*\*\*,  $P < 0.001$ ,  
 53 \*\*\*\*,  $P < 0.0001$ ; Mann Whitney test). The color of asterisks denotes significance for matching  
 54 group (red, intact combo; blue, N297Q combo; black, isotype).

55

56

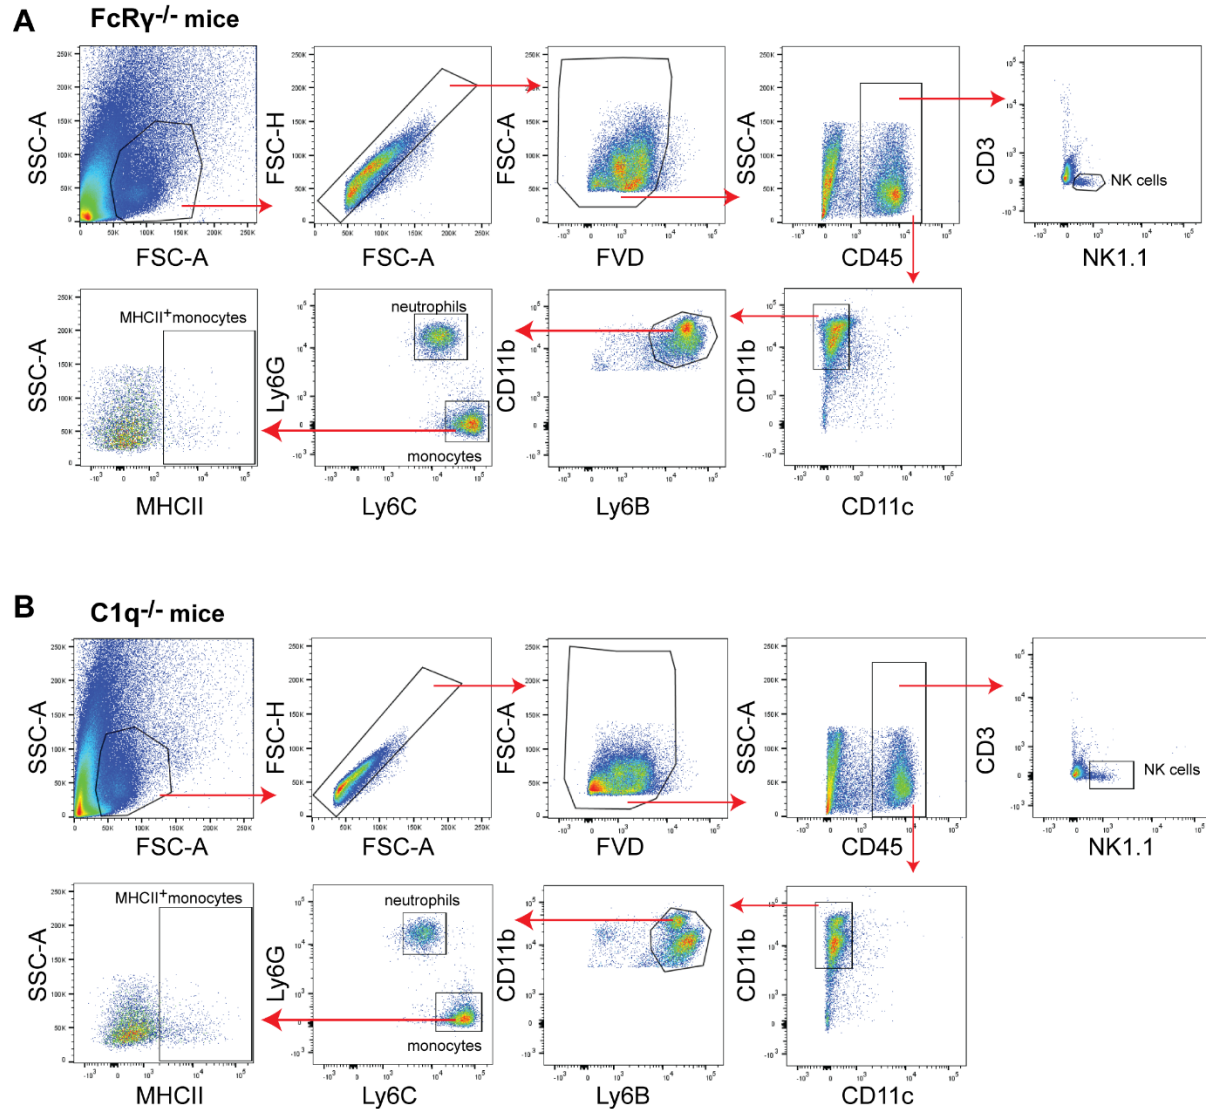

57

58 **Figure S6. Gating scheme for infiltrating immune cells in *FcR $\gamma$ <sup>-/-</sup>* and *C1q<sup>-/-</sup>* mice. (A) *FcR $\gamma$ <sup>-/-</sup>***  
 59 **or (B) *C1q<sup>-/-</sup>* mice** were inoculated with 10<sup>3</sup> FFU of CHIKV and administered a cocktail of intact  
 60 or N297Q variants of humanized anti-CHIKV mAbs or an isotype control mAb at 3 dpi. Ipsilateral  
 61 feet were harvested at 4 dpi, and single cell suspensions were analyzed by flow cytometry. The  
 62 plots are representative of three independent experiments. Fixable viability dye: FVD.

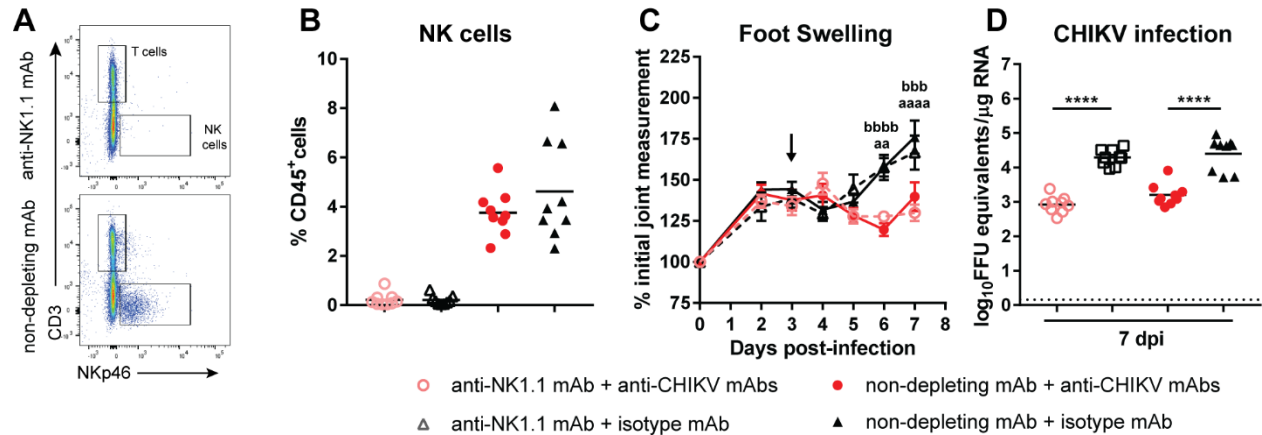

63

64 **Figure S7. NK cell depletion does not impact mAb-mediated protection.** WT mice were

65 inoculated with  $10^3$  FFU of CHIKV and administered a cocktail of intact or N297Q variants of

66 humanized anti-CHIKV mAbs or an isotype control mAb at 3 dpi. NK cells were depleted using

67 anti-NK1.1. **(A-B)** NK cell depletion was confirmed by flow cytometry **(A)**, the top is the specific

68 cell depletion and the bottom is the isotype non-depleting). **(C)** Foot swelling was measured prior

69 to infection and for 7 dpi ( $n = 9$ , 3 experiments). Bars indicated mean  $\pm$  SEM (two-way ANOVA

70 with Tukey's post-test: <sup>a</sup>anti-CHIKV mAb + anti-NK1.1 mAb vs isotype mAb + anti-NK1.1 mAb

71 (open circle vs open triangle); <sup>b</sup>anti-CHIKV mAb + isotype non-depleting mAb vs isotype mAb +

72 isotype non-depleting mAb (closed circle vs closed triangle); <sup>aa</sup>,  $P < 0.01$ , <sup>bbb</sup>,  $P < 0.001$ , <sup>aaaa</sup>, <sup>bbbb</sup>,

73  $P < 0.0001$ ). **(D)** Ipsilateral ankles were collected at 7 dpi, and viral RNA was determined.

74 Significance was determined by a student's t-test between mice receiving either the anti-NK1.1

75 mAb or isotype non-depleting mAb ( $n = 9$ , three experiments). Bars indicate mean (student's t-

76 test; \*\*\*\*,  $P < 0.0001$ ). Open symbols denote mice depleted of NK cells and closed symbols

77 denote mice that receive isotype non-depleting mAb.

78

79

**Table S1: Pro-inflammatory chemokine and cytokine expression in joint tissue homogenates<sup>a</sup>**

| <b>Cytokine/<br/>Chemokine</b> | <b>Antibody</b>            | <b>Mean pg/ml<br/>(± SD)</b> | <b>P value<br/>vs.<br/>isotype</b> | <b>P value<br/>vs.<br/>N297Q</b> |
|--------------------------------|----------------------------|------------------------------|------------------------------------|----------------------------------|
| CCL2<br>(MCP-1)                | Intact (CHK-152 + CHK-166) |                              |                                    |                                  |
|                                | 4 dpi                      | 4985 (± 992)                 | <b>0.0001</b>                      | <b>0.002</b>                     |
|                                | 7 dpi                      | 715 (± 303)                  | <b>0.005</b>                       | <b>0.02</b>                      |
|                                | N297Q (CHK-152 + CHK-166)  |                              |                                    |                                  |
|                                | 4 dpi                      | 2434 (± 535)                 | >0.9                               |                                  |
|                                | 7 dpi                      | 1827 (± 992)                 | >0.9                               |                                  |
|                                | isotype control (WNV-E16)  |                              |                                    |                                  |
|                                | 4 dpi                      | 2066 (± 850)                 |                                    |                                  |
|                                | 7 dpi                      | 2169 (± 1128)                |                                    |                                  |
| CCL3<br>(MIP-1 $\alpha$ )      | Intact (CHK-152 + CHK-166) |                              |                                    |                                  |
|                                | 4 dpi                      | 209 (± 36)                   | <b>&lt;0.0001</b>                  | <b>0.009</b>                     |
|                                | 7 dpi                      | 119 (± 32)                   | <b>0.004</b>                       | <b>0.007</b>                     |
|                                | N297Q (CHK-152 + CHK-166)  |                              |                                    |                                  |
|                                | 4 dpi                      | 134 (± 21)                   | 0.36                               |                                  |
|                                | 7 dpi                      | 280 (± 164)                  | >0.9                               |                                  |
|                                | isotype control (WNV-E16)  |                              |                                    |                                  |
|                                | 4 dpi                      | 111 (± 28)                   |                                    |                                  |
|                                | 7 dpi                      | 276 (± 126)                  |                                    |                                  |
| CCL4<br>(MIP-1 $\beta$ )       | Intact (CHK-152 + CHK-166) |                              |                                    |                                  |
|                                | 4 dpi                      | 257 (± 66)                   | <b>&lt;0.0001</b>                  | <b>0.01</b>                      |
|                                | 7 dpi                      | 91.0 (± 26)                  | <b>0.009</b>                       | <b>0.02</b>                      |
|                                | N297Q (CHK-152 + CHK-166)  |                              |                                    |                                  |
|                                | 4 dpi                      | 146 (± 31)                   | 0.2                                |                                  |
|                                | 7 dpi                      | 196 (± 115)                  | >0.9                               |                                  |
|                                | isotype control (WNV-E16)  |                              |                                    |                                  |
|                                | 4 dpi                      | 107 (± 33)                   |                                    |                                  |
|                                | 7 dpi                      | 210 (± 90)                   |                                    |                                  |
| CCL5<br>(RANTES)               | Intact (CHK-152 + CHK-166) |                              |                                    |                                  |
|                                | 4 dpi                      | 444 (± 129)                  | <b>0.001</b>                       | 0.17                             |
|                                | 7 dpi                      | 320 (± 72)                   | <b>0.04</b>                        | 0.2                              |
|                                | N297Q (CHK-152 + CHK-166)  |                              |                                    |                                  |
|                                | 4 dpi                      | 320 (± 66)                   | 0.3                                |                                  |



|                    |                            |                   |               |             |
|--------------------|----------------------------|-------------------|---------------|-------------|
|                    | 7 dpi                      | 430 ( $\pm$ 128)  | >0.9          |             |
|                    | isotype control (WNV-E16)  |                   |               |             |
|                    | 4 dpi                      | 235 ( $\pm$ 117)  |               |             |
|                    | 7 dpi                      | 489 ( $\pm$ 153)  |               |             |
| CCL11<br>(Eotaxin) | Intact (CHK-152 + CHK-166) |                   |               |             |
|                    | 4 dpi                      | 61 ( $\pm$ 17)    | 0.1           | 0.6         |
|                    | 7 dpi                      | 115 ( $\pm$ 39)   | 0.06          | 0.9         |
|                    | N297Q (CHK-152 + CHK-166)  |                   |               |             |
|                    | 4 dpi                      | 51 ( $\pm$ 17)    | >0.9          |             |
|                    | 7 dpi                      | 137 ( $\pm$ 27)   | 0.7           |             |
|                    | isotype control (WNV-E16)  |                   |               |             |
|                    | 4 dpi                      | 44 ( $\pm$ 19)    |               |             |
|                    | 7 dpi                      | 183 ( $\pm$ 70)   |               |             |
| CXCL1<br>(KC)      | Intact (CHK-152 + CHK-166) |                   |               |             |
|                    | 4 dpi                      | 51 ( $\pm$ 11)    | <b>0.0009</b> | 0.1         |
|                    | 7 dpi                      | 22.9 ( $\pm$ 11)  | >0.9          | 0.5         |
|                    | N297Q (CHK-152 + CHK-166)  |                   |               |             |
|                    | 4 dpi                      | 42 ( $\pm$ 12)    | 0.3           |             |
|                    | 7 dpi                      | 30.7 ( $\pm$ 13)  | 0.5           |             |
|                    | isotype control (WNV-E16)  |                   |               |             |
|                    | 4 dpi                      | 33 ( $\pm$ 8)     |               |             |
|                    | 7 dpi                      | 21.9 ( $\pm$ 7.6) |               |             |
| TNF- $\alpha$      | Intact (CHK-152 + CHK-166) |                   |               |             |
|                    | 4 dpi                      | 58 ( $\pm$ 11)    | <b>0.0001</b> | <b>0.01</b> |
|                    | 7 dpi                      | 51.9 ( $\pm$ 11)  | 0.8           | >0.9        |
|                    | N297Q (CHK-152 + CHK-166)  |                   |               |             |
|                    | 4 dpi                      | 37 ( $\pm$ 5)     | 0.6           |             |
|                    | 7 dpi                      | 53.2 ( $\pm$ 11)  | 0.5           |             |
|                    | isotype control (WNV-E16)  |                   |               |             |
|                    | 4 dpi                      | 31 ( $\pm$ 7)     |               |             |
|                    | 7 dpi                      | 43.0 ( $\pm$ 11)  |               |             |
| IFN- $\gamma$      | Intact (CHK-152 + CHK-166) |                   |               |             |
|                    | 4 dpi                      | 6.9 ( $\pm$ 2.5)  | <b>0.01</b>   | 0.6         |
|                    | 7 dpi                      | 2.7 ( $\pm$ 1.2)  | 0.1           | 0.4         |
|                    | N297Q (CHK-152 + CHK-166)  |                   |               |             |

|               |                            |                    |              |              |
|---------------|----------------------------|--------------------|--------------|--------------|
|               | 4 dpi                      | 5.1 ( $\pm$ 1.2)   | 0.3          |              |
|               | 7 dpi                      | 4.8 ( $\pm$ 3.2)   | >0.9         |              |
|               | isotype control (WNV-E16)  |                    |              |              |
|               | 4 dpi                      | 4.0 ( $\pm$ 1.2)   |              |              |
|               | 7 dpi                      | 5.0 ( $\pm$ 2.8)   |              |              |
| IL-1 $\alpha$ | Intact (CHK-152 + CHK-166) |                    |              |              |
|               | 4 dpi                      | 5.3 ( $\pm$ 0.8)   | <b>0.003</b> | <b>0.003</b> |
|               | 7 dpi                      | 7.0 ( $\pm$ 1.9)   | >0.9         | 0.5          |
|               | N297Q (CHK-152 + CHK-166)  |                    |              |              |
|               | 4 dpi                      | 3.8 ( $\pm$ 0.6)   | >0.9         |              |
|               | 7 dpi                      | 9.3 ( $\pm$ 4.7)   | >0.9         |              |
|               | isotype control (WNV-E16)  |                    |              |              |
|               | 4 dpi                      | 3.8 ( $\pm$ 1.0)   |              |              |
|               | 7 dpi                      | 12.5 ( $\pm$ 15.9) |              |              |
| IL-6          | Intact (CHK-152 + CHK-166) |                    |              |              |
|               | 4 dpi                      | 5.8 ( $\pm$ 1.4)   | <b>0.004</b> | <b>0.002</b> |
|               | 7 dpi                      | 6.6 ( $\pm$ 2.2)   | 0.7          | >0.9         |
|               | N297Q (CHK-152 + CHK-166)  |                    |              |              |
|               | 4 dpi                      | 3.3 ( $\pm$ 1.0)   | >0.9         |              |
|               | 7 dpi                      | 6.8 ( $\pm$ 1.4)   | 0.1          |              |
|               | isotype control (WNV-E16)  |                    |              |              |
|               | 4 dpi                      | 3.3 ( $\pm$ 0.5)   |              |              |
|               | 7 dpi                      | 5.1 ( $\pm$ 1.2)   |              |              |
| IL-12 p70     | Intact (CHK-152 + CHK-166) |                    |              |              |
|               | 4 dpi                      | 33 ( $\pm$ 11)     | <b>0.004</b> | 0.3          |
|               | 7 dpi                      | 6.8 ( $\pm$ 3.4)   | >0.9         | >0.9         |
|               | N297Q (CHK-152 + CHK-166)  |                    |              |              |
|               | 4 dpi                      | 24 ( $\pm$ 5.8)    | 0.2          |              |
|               | 7 dpi                      | 8.4 ( $\pm$ 2.7)   | >0.9         |              |
|               | isotype control (WNV-E16)  |                    |              |              |
|               | 4 dpi                      | 18 ( $\pm$ 6.2)    |              |              |
|               | 7 dpi                      | 7.6 ( $\pm$ 3.5)   |              |              |
| IL-5          | Intact (CHK-152 + CHK-166) |                    |              |              |
|               | 4 dpi                      | 5.4 ( $\pm$ 1.7)   | 0.09         | 0.5          |
|               | 7 dpi                      | LOD                |              |              |

|           |                            |              |                |                |
|-----------|----------------------------|--------------|----------------|----------------|
|           | N297Q (CHK-152 + CHK-166)  |              |                |                |
|           | 4 dpi                      | 4.4 (± 1.3)  | <b>&gt;0.9</b> |                |
|           | 7 dpi                      | LOD          |                |                |
|           | isotype control (WNV-E16)  |              |                |                |
|           | 4 dpi                      | 4.0 (± 1.1)  |                |                |
|           | 7 dpi                      | LOD          |                |                |
| IL-10     | Intact (CHK-152 + CHK-166) |              |                |                |
|           | 4 dpi                      | LOD          |                |                |
|           | 7 dpi                      | 15.2 (± 5.6) | 0.09           | 0.9            |
|           | N297Q (CHK-152 + CHK-166)  |              |                |                |
|           | 4 dpi                      | LOD          |                |                |
|           | 7 dpi                      | 19.9 (± 8.3) | 0.8            |                |
|           | isotype control (WNV-E16)  |              |                |                |
|           | 4 dpi                      | LOD          |                |                |
|           | 7 dpi                      | 25.6 (± 10)  |                |                |
| IL-12 p40 | Intact (CHK-152 + CHK-166) |              |                |                |
|           | 4 dpi                      | LOD          |                |                |
|           | 7 dpi                      | 7.8 (± 3.0)  | <b>&gt;0.9</b> | <b>&gt;0.9</b> |
|           | N297Q (CHK-152 + CHK-166)  |              |                |                |
|           | 4 dpi                      | LOD          |                |                |
|           | 7 dpi                      | 7.1 (± 1.9)  | 0.9            |                |
|           | isotype control (WNV-E16)  |              |                |                |
|           | 4 dpi                      | LOD          |                |                |
|           | 7 dpi                      | 8.4 (± 2.7)  |                |                |

82  
83 <sup>a</sup>Mice were inoculated with 10<sup>3</sup> FFU of CHIKV-LR in the footpad. At 3 dpi, mice received  
84 indicated intact, N297Q, or isotype mAbs. Ipsilateral joints were harvested 4 or 7 dpi,  
85 homogenized, and indicated cytokines or chemokines were measured. The mean (± standard  
86 deviation (SD)) in pg per milliliter from 8-10 mice per group is shown (2 independent  
87 experiments). Statistical significance was determined by a Kruskal-Wallis test with a Dunn's post-  
88 test correction. Statistically significant differences among chemokine levels are in bold. LOD,  
89 limit of detection for the assay.

90

91
